# Supplementary material
Source: Research Square preprint supplement (doi:10.21203/rs.3.rs-10296059/v1)
Supplement: Supplementary file 1 [file 26dff9b2f8e41604a7e90ca3.docx]

**Annex D. Supporting file of empirical data and tables**

**The purpose of the annex**

Appendix D documents the supporting data file and empirical tables. It serves as a map of the numerical apparatus of the paper and clearly separates what is used in the main text from what is kept for verification.

**Support file structure**

The `annex_tables_core_data_and_tests_academic_book.xlsx` file includes the database, audit variables, selected specifications, long-run coefficients, spread tests, and decision tables for financial channels. Values ​​are materialized as reproducibility results; the file does not appear as a dynamic calculator.

**The principle of non-repetition**

The main paper contains only the synthesis: table of variables, B3/C5 specifications and comparison of spreads. Appendix D and the supporting file contain the complete tables, including `Selected_Models` , `Long_Run` , `Bank_Summary` , `Bank_Long_Run` , `Spread_Tests` , and the EURIBOR series.

**Limitations and resources**

*Source: empirical package support file and author's calculations. The main limitation is that the numerical tables document the estimated model, but do not replace the economic interpretation of the results.*

**Raw data and supporting tables**

The complete table for this annex is stored in the supplementary material `Annex_D_workbook_inventory.csv`. For readability reasons, DOCX presents a limited view of rows and columns; CSV stores the entire numeric base for verification.

*Table. Summary view of the gross data of the annex.*

| **Sheet** | **Rows** | **Columns** | **Use in annexes** |
| --- | --- | --- | --- |
| Overview | 4 | 2 | Annex D |
| Core_Data | 77 | 30 | Annex E |
| Date_Audit | 17 | 6 | Annex E |
| Selected_Models | 14 | 17 | Annex D |
| Long_Run | 51 | 5 | Annex D |
| Cost_Decision | 7 | 4 | Annex A |
| FA_Decision | 10 | 3 | Annex C |
| Bank_Summary | 9 | 13 | Annex B |
| Bank_Long_Run | 41 | 4 | Annex B |
| Acronyms | 19 | 3 | Annex D/F |
| Core_Data_SpreadConsistent | 77 | 35 | Annex A-E |
| ECB_EURIBOR_12M_Q | 82 | 3 | Annex A/E |
| Spread_Tests | 3 | 18 | Annex A |

*Note: the complete table is stored in the supplementary material `Annex_D_workbook_inventory.csv`.*
