# Supplementary material
Source: Research Square preprint supplement (doi:10.21203/rs.3.rs-10296059/v1)
Supplement: Supplementary file 2 [file 536d2f4c148c4af6b3afbe63.docx]

**Annex B. Bank credit channel**

**The purpose of the annex**

Annex B documents the bank credit channel and the gross data used to distinguish credit as productive financing from credit as debt stock, leverage or balance sheet stress.

**Theoretical framework**

Bernanke and Blinder (1988), Kashyap, Stein and Wilcox (1993), Kashyap and Stein (2000) and Gertler and Gilchrist (1994) show that banks influence not only the price of financing, but also the quantity, standards and composition of credit. In Albania, this channel is important because the capital markets are limited and the firms mainly depend on the banking system.

**Empirical specification**

The main variables are the total credit stock, business credit, business credit in lek and the corresponding ratios to the gross domestic product. Credit-to-GDP ratios are not interpreted as new credit flows, but as indicators of financial intensity and potential pressure on balance sheets.

**Interpretation of results**

Tables `Bank_Summary` and `Bank_Long_Run` document bank specifications and long-run coefficients. A negative sign of credit ratios/GDP does not contradict the role of banks; it shows that the variable contains overlapping mechanisms: accumulated debt, denominator effect, credit for liquidity and currency exposure.

**Limitations and resources**

*Source: author's calculations based on Bank of Albania statistics and harmonized empirical basis. The main limitation is the lack of complete disaggregation by new credit flows, maturity, collateral, currency and non-performing loans.*

**Raw data and supporting tables**

The complete table for this annex is stored in the supplementary material `Annex_B_raw_bank_lending_credit_channel.csv`. For readability reasons, DOCX presents a limited view of rows and columns; CSV stores the entire numeric base for verification.

*Table. Summary view of the gross data of the annex.*

| **dated** | **LGFCF** | **LGDP** | **credit_total** | **credit_business** | **credit_business_all** | **credit_total_gdp** | **credit_business_gdp** |
| --- | --- | --- | --- | --- | --- | --- | --- |
| 2006Q4 | 11.5099 | 12.3601 | 195747.0000 | 127085.0000 | 26286.0000 | 0.8390 | 0.5447 |
| 2007Q1 | 11.5184 | 12.3895 | 218638.0000 | 141449.0000 | 27724.0000 | 0.9100 | 0.5887 |
| 2007Q2 | 11.5255 | 12.4127 | 240058.0000 | 150957.0000 | 31201.0000 | 0.9762 | 0.6139 |
| 2007Q3 | 11.5327 | 12.4519 | 260859.0000 | 161794.0000 | 33435.0000 | 1.0200 | 0.6327 |
| 2007Q4 | 11.5430 | 12.5007 | 293864.0000 | 182049.0000 | 35708.0000 | 1.0943 | 0.6779 |
| 2008Q1 | 11.5539 | 12.5173 | 316291.0000 | 195405.0000 | 37694.0000 | 1.1584 | 0.7157 |
| 2008Q2 | 11.5722 | 12.5270 | 348254.0000 | 216401.0000 | 42934.0000 | 1.2633 | 0.7850 |
| 2008Q3 | 11.5848 | 12.5594 | 377677.0000 | 234502.0000 | 45048.0000 | 1.3263 | 0.8235 |
| 2008Q4 | 11.5946 | 12.5683 | 396264.0000 | 242051.0000 | 49111.0000 | 1.3792 | 0.8425 |
| 2009Q1 | 11.5884 | 12.5959 | 416437.0000 | 256301.0000 | 54796.0000 | 1.4100 | 0.8678 |
| 2009Q2 | 11.6383 | 12.6070 | 417984.0000 | 259163.0000 | 59901.0000 | 1.3997 | 0.8678 |
| 2009Q3 | 11.5776 | 12.5934 | 427571.0000 | 268610.0000 | 68277.0000 | 1.4513 | 0.9118 |
| 2009Q4 | 11.4966 | 12.5868 | 440397.0000 | 275480.0000 | 70353.0000 | 1.5047 | 0.9412 |
| 2010Q1 | 11.4937 | 12.6330 | 448752.0000 | 283584.0000 | 72420.0000 | 1.4641 | 0.9252 |

*Note: the complete table is stored in the supplementary material `Annex_B_raw_bank_lending_credit_channel.csv`.*
