# Supplementary material
Source: Research Square preprint supplement (doi:10.21203/rs.3.rs-10296059/v1)
Supplement: Supplementary file 3 [file 83592530c8f9016bd01b0fe9.docx]

**Annex E. Database construction methodology**

**The purpose of the annex**

Annex E documents the database construction methodology and presents the full dataset used in the main specifications and spread controls.

**Resources and harmonization**

Quarterly base harmonizes series from INSTAT, Bank of Albania and ECB Data Portal. Gross fixed capital formation and gross domestic product are related to national accounts; interest rates, yields, credit and monetary indicators are related to Bank of Albania statistics; The 12-month EURIBOR is obtained from ECB and aggregated to quarterly averages.

**RESTRUCTURING**

`LGFCF = ln(GFCF)` , `LGDP = ln(GDP)` , `spread_all_12m = i_all - bth_12m` , `spread_eur_euribor_12m = i_eur - euribor_12m` , `credit_business_gdp = credit_business / GDP` . These are econometric constructs, not pristine series.

**Limitations and resources**

*Source: author's calculations on INSTAT, Bank of Albania, ECB Data Portal and European Money Markets Institute. Limitations relate to quarterly reconciliation, price index status, the difference between stock and credit flow, and the proxy measure of the cost of funding.*

**Raw data and supporting tables**

The complete table for this annex is stored in the supplementary material `Annex_E_raw_core_methodology_dataset.csv`. For readability reasons, DOCX presents a limited view of rows and columns; CSV stores the entire numeric base for verification.

*Table. Summary view of the gross data of the annex.*

| **dated** | **year** | **GFCF** | **MNE** | **LGFCF** | **LGDP** | **cpi** | **dpp** |
| --- | --- | --- | --- | --- | --- | --- | --- |
| 2006Q4 | 2006 | 99695.5900 | 233307.8600 | 11.5099 | 12.3601 | 2.5333 |  |
| 2007Q1 | 2007 | 100548.5600 | 240259.7400 | 11.5184 | 12.3895 | 2.8333 | 93.2000 |
| 2007Q2 | 2007 | 101263.8600 | 245901.9000 | 11.5255 | 12.4127 | 1.7667 | 94.1000 |
| 2007Q3 | 2007 | 101996.8800 | 255732.9000 | 11.5327 | 12.4519 | 3.5667 | 94.5000 |
| 2007Q4 | 2007 | 103053.6200 | 268529.9400 | 11.5430 | 12.5007 | 3.6000 | 96.9000 |
| 2008Q1 | 2008 | 104179.6200 | 273031.9200 | 11.5539 | 12.5173 | 3.7333 | 97.6000 |
| 2008Q2 | 2008 | 106106.8900 | 275673.2800 | 11.5722 | 12.5270 | 4.2000 | 99.6000 |
| 2008Q3 | 2008 | 107456.0800 | 284750.1200 | 11.5848 | 12.5594 | 2.9667 | 99.2000 |
| 2008Q4 | 2008 | 108507.7300 | 287315.1900 | 11.5946 | 12.5683 | 2.5333 | 98.8000 |
| 2009Q1 | 2009 | 107844.3000 | 295336.5900 | 11.5884 | 12.5959 | 1.8667 | 98.1000 |
| 2009Q2 | 2009 | 113354.6700 | 298631.3400 | 11.6383 | 12.6070 | 2.1000 | 97.8000 |
| 2009Q3 | 2009 | 106680.8200 | 294605.6100 | 11.5776 | 12.5934 | 2.1333 | 98.2000 |
| 2009Q4 | 2009 | 98377.1600 | 292683.8400 | 11.4966 | 12.5868 | 2.8667 | 98.5000 |
| 2010Q1 | 2010 | 98095.3700 | 306509.4600 | 11.4937 | 12.6330 | 3.9667 | 96.1000 |

*Note: the complete table is stored in the supplementary material `Annex_E_raw_core_methodology_dataset.csv`.*
