# Supplementary material
Source: Research Square preprint supplement (doi:10.21203/rs.3.rs-10296059/v1)
Supplement: Supplementary file 4 [file 9fb4cbe3d44caba84ed6baca.docx]

**Annex A. The cost of capital channel**

**The purpose of the annex**

Annex A fully documents the cost of capital channel. It links the theory of user cost of capital with currency-consistent spreads and with the gross data used to measure the relative financing cost in lek and euro.

**Theoretical framework**

In the neoclassical investment approach, the firm selects the desired capital stock by comparing the expected return with the cost of using the capital. Jorgenson (1963) places the interest rate and the financing cost at the center of this decision, while Tobin (1969) explains investment through the relative valuation of capital. In a bank-centric system, credit spreads are more informative indicators than the policy rate in isolation because they include risk premiums, liquidity, bank competition and currency segmentation.

**Empirical specification**

The block in lek uses `spread_all_12m = i_all - bth_12m`. The euro block uses `spread_eur_euribor_12m = i_eur - euribor_12m`. The `i_eur - bth_12m` indicator is kept only as an cross-currency diagnostic, because it mixes a loan rate in euros with a benchmark in lek.

**Interpretation of results**

The results in `Spread_Tests` show that the ALL -consistent block and the EUR -consistent block bear the negative sign of the spread in the relationship with gross fixed capital formation. This evidence supports the cost of capital channel, but does not convert the spread into a full structural measure of user cost.

**Limitations and resources**

*Source: author's calculations on data from INSTAT, Bank of Albania, ECB Data Portal and European Money Markets Institute. The main limitation relates to the fact that spreads are proxies of financing conditions, not full measures of each firm's cost of capital.*

**Raw data and supporting tables**

The complete table for this annex is stored in the supplementary material `Annex_A_raw_cost_of_capital.csv`. For readability reasons, DOCX presents a limited view of rows and columns; CSV stores the entire numeric base for verification.

*Table. Summary view of the gross data of the annex.*

| **dated** | **LGFCF** | **LGDP** | **cpi** | **i_all** | **bth_12m** | **spread_all_12m** | **i_eur** |
| --- | --- | --- | --- | --- | --- | --- | --- |
| 2006Q4 | 11.5099 | 12.3601 | 2.5333 | 13.9367 | 7.5767 | 6.3600 | 7.8633 |
| 2007Q1 | 11.5184 | 12.3895 | 2.8333 | 14.1100 | 7.5833 | 6.5267 | 8.2700 |
| 2007Q2 | 11.5255 | 12.4127 | 1.7667 | 12.9633 | 7.8733 | 5.0900 | 8.3533 |
| 2007Q3 | 11.5327 | 12.4519 | 3.5667 | 13.1200 | 7.9833 | 5.1367 | 8.4433 |
| 2007Q4 | 11.5430 | 12.5007 | 3.6000 | 14.0667 | 8.1433 | 5.9233 | 8.6600 |
| 2008Q1 | 11.5539 | 12.5173 | 3.7333 | 13.0333 | 8.0833 | 4.9500 | 7.8267 |
| 2008Q2 | 11.5722 | 12.5270 | 4.2000 | 12.9767 | 8.1600 | 4.8167 | 8.4933 |
| 2008Q3 | 11.5848 | 12.5594 | 2.9667 | 12.7100 | 8.1267 | 4.5833 | 8.4033 |
| 2008Q4 | 11.5946 | 12.5683 | 2.5333 | 12.6900 | 8.2000 | 4.4900 | 8.0500 |
| 2009Q1 | 11.5884 | 12.5959 | 1.8667 | 13.7400 | 8.9233 | 4.8167 | 7.6633 |
| 2009Q2 | 11.6383 | 12.6070 | 2.1000 | 13.5567 | 9.1700 | 4.3867 | 7.6800 |
| 2009Q3 | 11.5776 | 12.5934 | 2.1333 | 13.3500 | 9.2900 | 4.0600 | 7.9267 |
| 2009Q4 | 11.4966 | 12.5868 | 2.8667 | 13.7133 | 9.2867 | 4.4267 | 8.2867 |
| 2010Q1 | 11.4937 | 12.6330 | 3.9667 | 13.4833 | 8.8367 | 4.6467 | 7.5133 |

*Note: the complete table is stored in the supplementary material `Annex_A_raw_cost_of_capital.csv`.*
