# Supplementary material
Source: Research Square preprint supplement (doi:10.21203/rs.3.rs-10296059/v1)
Supplement: Supplementary file 5 [file c9c14e106bd5468c5f160c2b.xlsx]

## Sheet: Overview
Artifact	Description
Integrated PhD rebuild	New paper harmonising original PhD version with the three follow-up tests.
Author	Admir Mulaj
Main sample	2006Q4-2025Q4
Core dependent variable	LGFCF

## Sheet: Core_Data
date	year	GFCF	gdp	LGFCF	LGDP	cpi	dppi	i_base_rate	i_all	i_all_5y	i_eur	i_eur_5y	bth_12m	spread_all_12m	spread_all_5y_12m	spread_eur_12m	spread_eur_5y_12m	credit_total	credit_business	credit_business_all	Lcredit_total	Lcredit_business	Lcredit_business_all	credit_total_gdp	credit_business_gdp	credit_business_all_gdp	shock_2008_09	shock_2020	shock_2022
2006Q4	2006	99695.6	233308	11.5099	12.3601	2.53333		5.337	13.9367	10.55	7.86333	8.15667	7.57667	6.36	2.97333	0.286667	0.58	195747	127085	26286	12.1846	11.7526	10.1768	0.839007	0.544709	0.112667	0	0	0
2007Q1	2007	100549	240260	11.5184	12.3895	2.83333	93.2	5.5	14.11	12.5133	8.27	8.35667	7.58333	6.52667	4.93	0.686667	0.773333	218638	141449	27724	12.2952	11.8597	10.2301	0.910007	0.588734	0.115392	0	0	0
2007Q2	2007	101264	245902	11.5255	12.4127	1.76667	94.1	5.511	12.9633	13.4133	8.35333	8.2	7.87333	5.09	5.54	0.48	0.326667	240058	150957	31201	12.3886	11.9248	10.3482	0.976235	0.613891	0.126884	0	0	0
2007Q3	2007	101997	255733	11.5327	12.4519	3.56667	94.5	5.7636	13.12	13.5333	8.44333	7.87333	7.98333	5.13667	5.55	0.46	-0.11	260859	161794	33435	12.4717	11.9941	10.4174	1.02004	0.632668	0.130742	0	0	0
2007Q4	2007	103054	268530	11.543	12.5007	3.6	96.9	6.0951	14.0667	13.8267	8.66	8.11	8.14333	5.92333	5.68333	0.516667	-0.0333333	293864	182049	35708	12.5909	12.112	10.4831	1.09434	0.677947	0.132976	0	0	0
2008Q1	2008	104180	273032	11.5539	12.5173	3.73333	97.6	6.25	13.0333	13.5433	7.82667	7.79333	8.08333	4.95	5.46	-0.256667	-0.29	316291	195405	37694	12.6644	12.1828	10.5373	1.15844	0.715686	0.138057	1	0	0
2008Q2	2008	106107	275673	11.5722	12.527	4.2	99.6	6.25	12.9767	12.3233	8.49333	8.04667	8.16	4.81667	4.16333	0.333333	-0.113333	348254	216401	42934	12.7607	12.2849	10.6674	1.26329	0.784991	0.155742	1	0	0
2008Q3	2008	107456	284750	11.5848	12.5594	2.96667	99.2	6.25	12.71	12.1667	8.40333	7.96667	8.12667	4.58333	4.04	0.276667	-0.16	377677	234502	45048	12.8418	12.3652	10.7155	1.32635	0.823536	0.158202	1	0	0
2008Q4	2008	108508	287315	11.5946	12.5683	2.53333	98.8	6.25	12.69	12.6467	8.05	7.55333	8.2	4.49	4.44667	-0.15	-0.646667	396264	242051	49111	12.8898	12.3969	10.8018	1.3792	0.842458	0.170931	1	0	0
2009Q1	2009	107844	295337	11.5884	12.5959	1.86667	98.1	5.9	13.74	14.5567	7.66333	7.08333	8.92333	4.81667	5.63333	-1.26	-1.84	416437	256301	54796	12.9395	12.4541	10.9114	1.41004	0.867827	0.185537	1	0	0
2009Q2	2009	113355	298631	11.6383	12.607	2.1	97.8	5.75	13.5567	13.86	7.68	7.46667	9.17	4.38667	4.69	-1.49	-1.70333	417984	259163	59901	12.9432	12.4652	11.0004	1.39967	0.867836	0.200585	1	0	0
2009Q3	2009	106681	294606	11.5776	12.5934	2.13333	98.2	5.75	13.35	13.8	7.92667	7.67	9.29	4.06	4.51	-1.36333	-1.62	427571	268610	68277	12.9659	12.501	11.1313	1.45133	0.911761	0.231757	1	0	0
2009Q4	2009	98377.2	292684	11.4966	12.5868	2.86667	98.5	5.3967	13.7133	14.0133	8.28667	7.90667	9.28667	4.42667	4.72667	-1	-1.38	440397	275480	70353	12.9954	12.5263	11.1613	1.50469	0.94122	0.240372	1	0	0
2010Q1	2010	98095.4	306509	11.4937	12.633	3.96667	96.1	5.25	13.4833	12.71	7.51333	7.02	8.83667	4.64667	3.87333	-1.32333	-1.81667	448752	283584	72420	13.0142	12.5553	11.1902	1.46407	0.925205	0.236273	0	0	0
2010Q2	2010	101181	317278	11.5247	12.6675	3.83333	98.1	5.25	13.2767	12.8667	7.58333	7.68667	8.12333	5.15333	4.74333	-0.54	-0.436667	457728	292227	76672	13.034	12.5853	11.2473	1.44267	0.921043	0.241655	0	0	0
2010Q3	2010	101429	318689	11.5271	12.672	3.43333	98.7	5.0734	11.3867	11.71	7.54	8	7.85	3.53667	3.86	-0.31	0.15	460825	295512	78688	13.0408	12.5965	11.2732	1.446	0.927275	0.246912	0	0	0
2010Q4	2010	89697.5	316040	11.4042	12.6636	3.26667	99.2	5	12.2233	11.3	7.24333	7.34	7.45	4.77333	3.85	-0.206667	-0.11	483130	315879	83235	13.088	12.6631	11.3294	1.5287	0.999492	0.263369	0	0	0
2011Q1	2011	105386	329109	11.5654	12.7041	4.36667	99.8	5.025	12.9067	10.8333	7.34333	7.57333	7.01667	5.89	3.81667	0.326667	0.556667	496141	327811	87408	13.1146	12.7002	11.3783	1.50753	0.996055	0.265589	0	0	0
2011Q2	2011	102708	318871	11.5396	12.6725	3.63333	100.1	5.25	11.86	11.0867	7.41667	7.63	7.43667	4.42333	3.65	-0.02	0.193333	510390	334942	93403	13.1429	12.7217	11.4447	1.60062	1.0504	0.292918	0	0	0
2011Q3	2011	104925	326264	11.561	12.6955	3.16667	100	5.2446	11.4633	10.77	7.68667	7.73667	7.68333	3.78	3.08667	0.00333333	0.0533333	528028	349263	96950	13.1769	12.7636	11.482	1.61841	1.07049	0.297152	0	0	0
2011Q4	2011	101749	336218	11.5303	12.7255	2.53333	100.9	4.913	11.4667	10.9467	7.32333	7.30333	7.28333	4.18333	3.66333	0.04	0.02	541900	364374	108322	13.2028	12.8059	11.5929	1.61175	1.08374	0.322177	0	0	0
2012Q1	2012	100196	326783	11.5149	12.6971	1.06667	102.3	4.5549	11.5567	10.3867	7.25333	7.43667	7.17	4.38667	3.21667	0.0833333	0.266667	550076	370787	110828	13.2178	12.8234	11.6157	1.68331	1.13466	0.339149	0	0	0
2012Q2	2012	99927.8	330504	11.5122	12.7084	1.9	101.6	4.25	11.2633	10.44	7.25667	7.23667	7.36	3.90333	3.08	-0.103333	-0.123333	552716	373734	114793	13.2226	12.8313	11.6509	1.67235	1.1308	0.347328	0	0	0
2012Q3	2012	98902.9	337082	11.5019	12.7281	2.7	100.4	4.0652	11.2	10.61	6.88	7.31	7.15333	4.04667	3.45667	-0.273333	0.156667	557176	376254	118754	13.2306	12.838	11.6848	1.65294	1.11621	0.3523	0	0	0
2012Q4	2012	84240.1	333306	11.3414	12.7168	2.43333	100.6	4	10.0367	9.72667	7.24	7.20333	6.53667	3.5	3.19	0.703333	0.666667	554732	370993	121809	13.2262	12.8239	11.7102	1.66433	1.11307	0.365457	0	0	0
2013Q1	2013	100155	340798	11.5145	12.739	2.53333	100.6	3.8306	10.9333	9.6	6.67	6.59	6.37333	4.56	3.22667	0.296667	0.216667	556521	373836	120356	13.2295	12.8316	11.6982	1.63299	1.09694	0.353159	0	0	0
2013Q2	2013	98812.8	343260	11.501	12.7462	2.23333	101	3.75	10.87	10.48	6.95	7.21667	5.84333	5.02667	4.63667	1.10667	1.37333	557336	371985	120092	13.2309	12.8266	11.696	1.62366	1.08368	0.349857	0	0	0
2013Q3	2013	78677.8	328335	11.2731	12.7018	1.5	100.3	3.5815	10.1833	9.54667	7.01	7.00667	4.79333	5.39	4.75333	2.21667	2.21333	547333	362259	119927	13.2128	12.8001	11.6946	1.667	1.10332	0.365258	0	0	0
2013Q4	2013	91769.5	343798	11.427	12.7478	1.53333	100.8	3.3614	9.29333	8.92667	6.93333	6.68667	3.73333	5.56	5.19333	3.2	2.95333	547928	363541	122945	13.2139	12.8036	11.7195	1.59375	1.05743	0.357608	0	0	0
2014Q1	2014	90418.8	346070	11.4122	12.7544	1.93333	101	2.9056	8.76333	8.59333	7.04	6.80333	3.75667	5.00667	4.83667	3.28333	3.04667	544879	361031	122945	13.2083	12.7967	11.7195	1.57447	1.04323	0.35526	0	0	0
2014Q2	2014	89138.4	348137	11.3979	12.7604	1.6	100.4	2.6621	9.11333	8.57	6.77667	6.33	3.40667	5.70667	5.16333	3.37	2.92333	548371	363723	125703	13.2147	12.8041	11.7417	1.57516	1.04477	0.361074	0	0	0
2014Q3	2014	89886.7	354036	11.4063	12.7772	1.76667	100.4	2.5	8.49	7.9	6.59333	6.27	3.21	5.28	4.69	3.38333	3.06	556417	372153	128209	13.2293	12.8271	11.7614	1.57164	1.05117	0.362135	0	0	0
2014Q4	2014	93091.2	354592	11.4413	12.7787	1.26667	98.7	2.4022	7.87333	7.51	6.42667	5.77333	3.29	4.58333	4.22	3.13667	2.48333	559987	372167	129429	13.2357	12.8271	11.7709	1.57924	1.04956	0.365008	0	0	0
2015Q1	2015	91666	349828	11.4259	12.7652	1.93333	97.6	2.075	8.12333	7.21333	6.31667	5.98	3.55333	4.57	3.66	2.76333	2.42667	557402	365598	128097	13.231	12.8093	11.7605	1.59336	1.04508	0.366171	0	0	0
2015Q2	2015	93423.1	364089	11.4449	12.8052	1.83333	98	2	8.47333	7.01	5.97	5.68	3.40333	5.07	3.60667	2.56667	2.27667	552369	361445	129944	13.222	12.7979	11.7749	1.51713	0.992737	0.356901	0	0	0
2015Q3	2015	93569.8	364793	11.4465	12.8071	1.8	96.3	2	7.93	7.09667	6.10333	5.47333	3.22333	4.70667	3.87333	2.88	2.25	546300	356554	129979	13.2109	12.7842	11.7751	1.49756	0.977416	0.356309	0	0	0
2015Q4	2015	94195.5	366077	11.4531	12.8106	2.06667	96.4	1.8424	7.68	6.56667	5.03	4.40333	2.85	4.83	3.71667	2.18	1.55333	546794	346210	122166	13.2118	12.7548	11.7131	1.49366	0.945731	0.333717	0	0	0
2016Q1	2016	94875.9	365773	11.4603	12.8098	0.666667	97.1	1.75	7.71333	6.29667	5.43	4.80667	1.83667	5.87667	4.46	3.59333	2.97	547243	346063	123338	13.2126	12.7544	11.7227	1.49613	0.946114	0.337198	0	0	0
2016Q2	2016	94900.4	367048	11.4606	12.8132	0.733333	97.4	1.3544	6.86333	5.85333	5.03333	4.81	1.38333	5.48	4.47	3.65	3.42667	552382	350670	126617	13.222	12.7676	11.7489	1.50493	0.955378	0.34496	0	0	0
2016Q3	2016	98980.9	370905	11.5027	12.8237	1.9	97	1.25	7.47333	5.87	4.77	4.38667	1.45	6.02333	4.42	3.32	2.93667	549692	345524	128596	13.2171	12.7528	11.7644	1.48203	0.93157	0.346709	0	0	0
2016Q4	2016	101505	383992	11.5279	12.8584	1.86667	97.4	1.25	7.12667	5.77333	4.71	4.18	2.44333	4.68333	3.33	2.26667	1.73667	547191	343070	131744	13.2126	12.7457	11.7886	1.42501	0.893429	0.34309	0	0	0
2017Q1	2017	102736	388137	11.5399	12.8691	2.36667	98.3	1.25	7.23	6.10333	4.60667	4.15667	2.79333	4.43667	3.31	1.81333	1.36333	547806	340847	132006	13.2137	12.7392	11.7906	1.41137	0.878162	0.340102	0	0	0
2017Q2	2017	107394	397178	11.5843	12.8921	2.03333	97.8	1.25	6.41667	5.82333	4.68667	4.89	1.93667	4.48	3.88667	2.75	2.95333	543614	333123	135037	13.206	12.7163	11.8133	1.36869	0.838725	0.339991	0	0	0
2017Q3	2017	105927	392999	11.5705	12.8816	1.73333	97.5	1.25	6.80667	5.91667	4.09667	4.02667	2.21	4.59667	3.70667	1.88667	1.81667	553593	339280	136965	13.2242	12.7346	11.8275	1.40864	0.863309	0.348512	0	0	0
2017Q4	2017	105984	401561	11.571	12.9031	1.8	98.3	1.25	6.84667	5.82333	4.28	4.45667	2.54333	4.30333	3.28	1.73667	1.91333	550280	329377	130852	13.2182	12.705	11.7818	1.37035	0.820241	0.325858	0	0	0
2018Q1	2018	107867	414417	11.5887	12.9346	1.93333	99.3	1.25	7.32	5.8	4	3.92	2.61333	4.70667	3.18667	1.38667	1.30667	548447	326348	130206	13.2148	12.6957	11.7769	1.32342	0.787486	0.314191	0	0	0
2018Q2	2018	107441	418478	11.5847	12.9444	2.2	99.1	1.1813	6.07667	5.45667	4.17667	3.76667	2.22667	3.85	3.23	1.95	1.54	530458	320863	129826	13.1815	12.6788	11.774	1.26759	0.766738	0.310234	0	0	0
2018Q3	2018	108690	413698	11.5963	12.9329	2.2	99.6	1	6.62667	5.71333	4.22667	4.33	1.72	4.90667	3.99333	2.50667	2.61	535254	322399	129849	13.1905	12.6835	11.7741	1.29383	0.779309	0.313874	0	0	0
2018Q4	2018	109560	415243	11.6042	12.9366	1.83333	99.5	1	6.61333	5.76	4.09333	4.35667	1.54	5.07333	4.22	2.55333	2.81667	532819	317578	127740	13.1859	12.6685	11.7578	1.28315	0.764801	0.307627	0	0	0
2019Q1	2019	109170	422809	11.6007	12.9547	1.56667	99.5	1	6.66	5.74	4.12333	4.19667	1.24	5.42	4.5	2.88333	2.95667	547343	326948	129000	13.2128	12.6976	11.7676	1.29454	0.773276	0.305103	0	0	0
2019Q2	2019	107356	430110	11.5839	12.9718	1.4	99.9	1	6.33667	5.33333	4.06333	3.82667	1.32333	5.01333	4.01	2.74	2.50333	553026	327896	130300	13.2232	12.7005	11.7776	1.28578	0.762353	0.302945	0	0	0
2019Q3	2019	103986	434074	11.552	12.981	1.4	99.2	1	6.23	5.45	3.96	3.56667	2.04	4.19	3.41	1.92	1.52667	565777	335068	135195	13.246	12.7221	11.8145	1.30341	0.771915	0.311456	0	0	0
2019Q4	2019	104125	425962	11.5533	12.9621	1.26667	99.1	1	6.26667	5.70333	4.27333	4	1.87	4.39667	3.83333	2.40333	2.13	570792	335885	141240	13.2548	12.7245	11.8582	1.34001	0.788533	0.331579	0	0	0
2020Q1	2020	92942.6	411693	11.4397	12.928	1.6	98.8	0.9615	6.2	5.57	4.13333	4.03667	1.87333	4.32667	3.69667	2.26	2.16333	597561	355040	142923	13.3006	12.78	11.8701	1.45147	0.862389	0.347159	0	1	0
2020Q2	2020	99616.1	383199	11.5091	12.8563	1.93333	97.7	0.5	5.64333	5.44667	3.96667	3.77667	2.06333	3.58	3.38333	1.90333	1.71333	589793	355937	149726	13.2875	12.7825	11.9166	1.53913	0.928856	0.390726	0	1	0
2020Q3	2020	108621	428559	11.5956	12.9682	1.4	97.3	0.5	5.63333	5.36	3.86	3.83333	1.70333	3.93	3.65667	2.15667	2.13	595011	357486	157712	13.2963	12.7869	11.9685	1.3884	0.834159	0.368006	0	1	0
2020Q4	2020	111311	430601	11.6201	12.9729	1.56667	97.8	0.5	5.80667	5.41667	4.11	4.09667	1.75667	4.05	3.66	2.35333	2.34	608780	370356	161975	13.3192	12.8222	11.9952	1.41379	0.860092	0.376161	0	1	0
2021Q1	2021	115599	446658	11.6579	13.0095	0.9	98.7	0.5	5.98333	5.53333	3.76	3.65667	2.03667	3.94667	3.49667	1.72333	1.62	610800	372662	164541	13.3225	12.8284	12.0109	1.36749	0.834334	0.368383	0	0	0
2021Q2	2021	137075	469616	11.8283	13.0597	1.76667	99.1	0.5	5.82	5.16667	3.93	3.87	1.66333	4.15667	3.50333	2.26667	2.20667	624786	376990	165759	13.3452	12.84	12.0183	1.33042	0.802762	0.352967	0	0	0
2021Q3	2021	121813	466617	11.7102	13.0533	2.36667	100.6	0.5	5.88	5.16	3.94	3.73	1.66	4.22	3.5	2.28	2.07	636991	384303	169082	13.3645	12.8592	12.0381	1.36513	0.823594	0.362357	0	0	0
2021Q4	2021	123801	480623	11.7264	13.0828	3.06667	101.7	0.5	5.75667	5.18	3.75	4.14	1.66333	4.09333	3.51667	2.08667	2.47667	666178	395163	172000	13.4093	12.8871	12.0552	1.38607	0.822189	0.357869	0	0	0
2022Q1	2022	126014	517277	11.7442	13.1563	4.43333	112.9	0.55	5.95333	5.36333	4.12667	4.19	1.67667	4.27667	3.68667	2.45	2.51333	683563	403166	172641	13.4351	12.9071	12.059	1.32146	0.779401	0.33375	0	0	1
2022Q2	2022	125907	525412	11.7433	13.1719	6.76667	115.4	1	6.36333	5.81	4.07667	3.83	2.51	3.85333	3.3	1.56667	1.32	702020	409447	175477	13.4617	12.9226	12.0753	1.33613	0.779287	0.33398	0	0	1
2022Q3	2022	126522	543976	11.7482	13.2067	7.86667	117.7	1.5571	6.71	6.49667	4.44333	4.26667	3.57667	3.13333	2.92	0.866667	0.69	718228	421387	176742	13.4845	12.9513	12.0824	1.32033	0.774643	0.324908	0	0	1
2022Q4	2022	128269	556548	11.7619	13.2295	7.86667	121.4	2.5543	7.33	6.76667	4.83	4.4	5.50667	1.82333	1.26	-0.676667	-1.10667	713552	411853	173607	13.478	12.9284	12.0645	1.2821	0.740013	0.311935	0	0	1
2023Q1	2023	127086	570634	11.7526	13.2545	6.53333	123.3	2.775	6.79853	7.0413	5.4728	5.8848	4.53	2.26853	2.5113	0.9428	1.3548	711453	405170	171993	13.4751	12.9121	12.0552	1.24678	0.710034	0.301407	0	0	0
2023Q2	2023	128480	582029	11.7635	13.2743	4.6	125	3	6.60083	6.68437	6.01087	6.26793	3.59667	3.00417	3.0877	2.4142	2.67127	713387	404347	182482	13.4778	12.91	12.1144	1.22569	0.69472	0.313528	0	0	0
2023Q3	2023	128907	594915	11.7668	13.2962	4.1	126.1	3	6.4292	6.54987	6.3471	6.60307	3.14	3.2892	3.40987	3.2071	3.46307	725262	407602	188667	13.4943	12.918	12.1477	1.2191	0.685144	0.317133	0	0	0
2023Q4	2023	132163	610698	11.7918	13.3224	3.9	126.6	3.1658	6.1592	6.43957	6.34437	6.68713	3.25	2.9092	3.18957	3.09437	3.43713	744163	421985	196936	13.52	12.9527	12.1906	1.21854	0.690988	0.322477	0	0	0
2024Q1	2024	134032	618445	11.8058	13.335	2.76667	127.5	3.25	6.21977	6.43677	6.40537	6.77997	3.57667	2.6431	2.8601	2.8287	3.2033	763589	427857	205910	13.5458	12.9665	12.2352	1.23469	0.691827	0.332948	0	0	0
2024Q2	2024	136066	620137	11.8209	13.3377	2.13333	127.9	3.25	6.46067	6.46363	6.61263	6.7623	3.51	2.95067	2.95363	3.10263	3.2523	795984	447350	212525	13.5873	13.0111	12.2668	1.28356	0.721373	0.342707	0	0	0
2024Q3	2024	138425	633116	11.8381	13.3584	2	128.1	3.0054	6.4297	6.40583	6.44343	6.5757	3.15333	3.27637	3.2525	3.2901	3.42237	812921	460491	213529	13.6084	13.04	12.2715	1.284	0.727341	0.337267	0	0	0
2024Q4	2024	137718	642070	11.833	13.3725	2	128.2	3	6.42367	6.36643	6.20043	6.26117	2.85667	3.567	3.50977	3.34377	3.4045	835817	469926	216946	13.6362	13.0603	12.2874	1.30175	0.731892	0.337885	0	0	0
2025Q1	2025	140453	647045	11.8526	13.3802	1.96667	128.4	2.8472	6.3029	6.27653	5.93323	6.00533	2.76	3.5429	3.51653	3.17323	3.24533	866431	486595	223735	13.6721	13.0952	12.3182	1.33906	0.752027	0.34578	0	0	0
2025Q2	2025	142421	657441	11.8665	13.3961	2.3	128.5	2.75	6.24453	6.17823	5.77943	5.80073	2.75	3.49453	3.42823	3.02943	3.05073	893034	493471	224349	13.7024	13.1092	12.321	1.35835	0.750594	0.341246	0	0	0
2025Q3	2025	143645	666305	11.8751	13.4095	2.4	128.5	2.5027	6.19463	6.2022	5.62353	5.63227	2.62	3.57463	3.5822	3.00353	3.01227	901771	497536	228635	13.7121	13.1174	12.3399	1.35339	0.746709	0.343138	0	0	0
2025Q4	2025	146143	674320	11.8923	13.4215	2.23333	128.6	2.5	6.15257	6.1602	5.58013	5.53277	2.48333	3.66923	3.67687	3.0968	3.04943	943745	516591	230172	13.7576	13.155	12.3466	1.39955	0.766092	0.341339	0	0	0

## Sheet: Data_Audit
ready_data_column	data_notes_human_label	data_notes_machine_label	sample_start	sample_end	non_missing_common_sample
date	date	date	2006Q4	2025Q4	77
GFCF	Gross Fixed Capital Formation	GFCF	2006Q4	2025Q4	77
gdp	GDP	gdp	2006Q4	2025Q4	77
cpi	CPI	cpi	2006Q4	2025Q4	77
dppi	Domestic producer price indices	dppi	2006Q4	2025Q4	76
i_base_rate	interest base rate	i_base_rate	2006Q4	2025Q4	77
i_all	interest in ALL for new loan	i_all	2006Q4	2025Q4	77
i_all_5y	interest in ALL for new loan more than 5 years	i_all_5y	2006Q4	2025Q4	77
i_eur	interest in EUR for new loan	i_eur	2006Q4	2025Q4	77
i_eur_5y	interest in EUR for new loan over 5 years	i_eur_5y	2006Q4	2025Q4	77
bth_3m	Yield i bonove të thesarit 3 mujore	bth_3m	2006Q4	2025Q4	77
bth_6m	Yield i bonove të thesarit 6 mujore	bth_6m	2006Q4	2025Q4	77
bth_12m	Yield i bonove të thesarit 12 mujore	bth_12m	2006Q4	2025Q4	77
credit_total	Kredia totale e papaguar e muajit të tretë të tremujorit	credit_total	2006Q4	2025Q4	77
credit_business	Kredia për biznesin e papaguar e muajit të tretë të tremujorit	credit_business	2006Q4	2025Q4	77
credit_business_all	Kredia për biznesin e papaguar e muajit të tretë të tremujorit në lekë	credit_business_all	2006Q4	2025Q4	77
credit_business_currency	Kredia për biznesin e papaguar e muajit të tretë të tremujorit në monedhë	credit_business_currency	2006Q4	2025Q4	77

## Sheet: Selected_Models
model_id	family	xvars	exog	excluded_years	ardl_order	n_ardl_selection	n_uecm	bic	aic	adj_r2_ardl	ecm_coefficient	ecm_t_normal	ecm_nw_t	bounds_f_stat	bounds_p_approx_not_exact	preferred_flag
A1	A	LGDP;cpi;spread_all_12m			(1, 1, 0, 0)	76	76	-438.613	-452.597	0.877009	-0.241064	-3.44114	-3.24692	3.53558	0.00701696	FALSE
A2	A	LGDP;cpi;spread_all_5y_12m			(1, 1, 0, 0)	76	76	-438.528	-452.513	0.876873	-0.242257	-3.44556	-3.43515	3.53993	0.00696534	FALSE
A3	A	LGDP;cpi;spread_eur_12m			(1, 1, 0, 0)	76	76	-440.504	-454.489	0.880033	-0.265048	-3.4404	-3.28022	3.68967	0.00540226	FALSE
A4	A	LGDP;cpi;spread_eur_5y_12m			(1, 1, 0, 0)	76	76	-440.092	-454.077	0.879381	-0.271383	-3.61259	-3.34151	3.8546	0.0040819	FALSE
B1	B	LGDP;cpi;spread_all_12m;credit_business_gdp			(1, 1, 0, 0, 0)	76	76	-439.273	-455.588	0.883157	-0.373551	-4.23743	-3.37419	4.12206	0.00105985	FALSE
B2	B	LGDP;cpi;spread_all_5y_12m;credit_business_gdp			(1, 1, 0, 0, 0)	76	76	-438.909	-455.224	0.882596	-0.354938	-4.18529	-3.50245	4.00378	0.00135222	FALSE
B3	B	LGDP;cpi;spread_eur_12m;credit_business_gdp			(1, 1, 0, 0, 0)	76	76	-445.58	-461.895	0.892462	-0.471989	-4.62672	-3.78321	4.96513	0.000185688	TRUE
B4	B	LGDP;cpi;spread_eur_5y_12m;credit_business_gdp			(1, 1, 0, 0, 0)	76	76	-443.59	-459.905	0.889609	-0.46886	-4.82413	-3.69611	5.2146	0.000110834	FALSE
C1_no_credit	C	LGDP;cpi;spread_eur_12m			(1, 1, 0, 0)	76	76	-440.504	-454.489	0.880033	-0.265048	-3.4404	-3.28022	3.68967	0.00540226	FALSE
C2_shock_dummies	C	LGDP;cpi;spread_eur_12m;credit_business_gdp	shock_2008_09;shock_2020;shock_2022		(1, 1, 0, 0, 1)	76	76	-438.379	-464.017	0.90008	-0.652545	-5.27703	-4.25811	5.96233	2.36398e-05	FALSE
C3_excluding_2020	C	LGDP;cpi;spread_eur_12m;credit_business_gdp		2020	(1, 2, 0, 0, 2)	71	71	-434.453	-457.08	0.931234	-0.6408	-5.92041	-5.36738	8.16539	2.59479e-07	FALSE
C4_excluding_2008_09	C	LGDP;cpi;spread_eur_12m;credit_business_gdp		2008;2009	(1, 1, 0, 0, 0)	68	68	-388.668	-404.205	0.890334	-0.575768	-4.90594	-4.03754	5.6634	4.38229e-05	FALSE
C5_alt_credit_business_all_gdp	C	LGDP;cpi;spread_eur_12m;credit_business_all_gdp			(1, 1, 0, 0, 0)	76	76	-450.962	-467.277	0.899815	-0.593174	-5.53126	-4.70749	6.84405	3.85035e-06	FALSE
preferred_maxlag2	preferred_maxlag2	LGDP;cpi;spread_eur_12m;credit_business_gdp			(1, 1, 0, 0, 0)	76	76	-445.58	-461.895	0.892462	-0.471989	-4.62672	-3.78321	4.96513	0.000185688	FALSE

## Sheet: Long_Run
variable	long_run_coefficient	ecm_denominator	note	model_id
LGDP	0.441218	-0.241064	Computed as -level coefficient divided by ECM coefficient.	A1
cpi	-0.00229999	-0.241064	Computed as -level coefficient divided by ECM coefficient.	A1
spread_all_12m	0.000169859	-0.241064	Computed as -level coefficient divided by ECM coefficient.	A1
LGDP	0.448263	-0.242257	Computed as -level coefficient divided by ECM coefficient.	A2
cpi	-0.00162917	-0.242257	Computed as -level coefficient divided by ECM coefficient.	A2
spread_all_5y_12m	0.00466953	-0.242257	Computed as -level coefficient divided by ECM coefficient.	A2
LGDP	0.500999	-0.265048	Computed as -level coefficient divided by ECM coefficient.	A3
cpi	-0.00949278	-0.265048	Computed as -level coefficient divided by ECM coefficient.	A3
spread_eur_12m	-0.0180347	-0.265048	Computed as -level coefficient divided by ECM coefficient.	A3
LGDP	0.534368	-0.271383	Computed as -level coefficient divided by ECM coefficient.	A4
cpi	-0.0121285	-0.271383	Computed as -level coefficient divided by ECM coefficient.	A4
spread_eur_5y_12m	-0.0251865	-0.271383	Computed as -level coefficient divided by ECM coefficient.	A4
LGDP	0.319024	-0.373551	Computed as -level coefficient divided by ECM coefficient.	B1
cpi	-0.00499482	-0.373551	Computed as -level coefficient divided by ECM coefficient.	B1
spread_all_12m	-0.019748	-0.373551	Computed as -level coefficient divided by ECM coefficient.	B1
credit_business_gdp	-0.344596	-0.373551	Computed as -level coefficient divided by ECM coefficient.	B1
LGDP	0.350971	-0.354938	Computed as -level coefficient divided by ECM coefficient.	B2
cpi	-0.00308273	-0.354938	Computed as -level coefficient divided by ECM coefficient.	B2
spread_all_5y_12m	-0.00895703	-0.354938	Computed as -level coefficient divided by ECM coefficient.	B2
credit_business_gdp	-0.335328	-0.354938	Computed as -level coefficient divided by ECM coefficient.	B2
LGDP	0.460474	-0.471989	Computed as -level coefficient divided by ECM coefficient.	B3
cpi	-0.0133941	-0.471989	Computed as -level coefficient divided by ECM coefficient.	B3
spread_eur_12m	-0.0293841	-0.471989	Computed as -level coefficient divided by ECM coefficient.	B3
credit_business_gdp	-0.347557	-0.471989	Computed as -level coefficient divided by ECM coefficient.	B3
LGDP	0.481483	-0.46886	Computed as -level coefficient divided by ECM coefficient.	B4
cpi	-0.0142246	-0.46886	Computed as -level coefficient divided by ECM coefficient.	B4
spread_eur_5y_12m	-0.0321408	-0.46886	Computed as -level coefficient divided by ECM coefficient.	B4
credit_business_gdp	-0.348994	-0.46886	Computed as -level coefficient divided by ECM coefficient.	B4
LGDP	0.500999	-0.265048	Computed as -level coefficient divided by ECM coefficient.	C1_no_credit
cpi	-0.00949278	-0.265048	Computed as -level coefficient divided by ECM coefficient.	C1_no_credit
spread_eur_12m	-0.0180347	-0.265048	Computed as -level coefficient divided by ECM coefficient.	C1_no_credit
LGDP	0.509995	-0.652545	Computed as -level coefficient divided by ECM coefficient.	C2_shock_dummies
cpi	-0.0119252	-0.652545	Computed as -level coefficient divided by ECM coefficient.	C2_shock_dummies
spread_eur_12m	-0.0236281	-0.652545	Computed as -level coefficient divided by ECM coefficient.	C2_shock_dummies
credit_business_gdp	-0.241956	-0.652545	Computed as -level coefficient divided by ECM coefficient.	C2_shock_dummies
LGDP	0.511423	-0.6408	Computed as -level coefficient divided by ECM coefficient.	C3_excluding_2020
cpi	-0.0120156	-0.6408	Computed as -level coefficient divided by ECM coefficient.	C3_excluding_2020
spread_eur_12m	-0.0223873	-0.6408	Computed as -level coefficient divided by ECM coefficient.	C3_excluding_2020
credit_business_gdp	-0.209682	-0.6408	Computed as -level coefficient divided by ECM coefficient.	C3_excluding_2020
LGDP	0.530902	-0.575768	Computed as -level coefficient divided by ECM coefficient.	C4_excluding_2008_09
cpi	-0.0148168	-0.575768	Computed as -level coefficient divided by ECM coefficient.	C4_excluding_2008_09
spread_eur_12m	-0.0309322	-0.575768	Computed as -level coefficient divided by ECM coefficient.	C4_excluding_2008_09
credit_business_gdp	-0.264912	-0.575768	Computed as -level coefficient divided by ECM coefficient.	C4_excluding_2008_09
LGDP	0.655803	-0.593174	Computed as -level coefficient divided by ECM coefficient.	C5_alt_credit_business_all_gdp
cpi	-0.0175636	-0.593174	Computed as -level coefficient divided by ECM coefficient.	C5_alt_credit_business_all_gdp
spread_eur_12m	-0.0178072	-0.593174	Computed as -level coefficient divided by ECM coefficient.	C5_alt_credit_business_all_gdp
credit_business_all_gdp	-1.04787	-0.593174	Computed as -level coefficient divided by ECM coefficient.	C5_alt_credit_business_all_gdp
LGDP	0.460474	-0.471989	Computed as -level coefficient divided by ECM coefficient.	preferred_maxlag2
cpi	-0.0133941	-0.471989	Computed as -level coefficient divided by ECM coefficient.	preferred_maxlag2
spread_eur_12m	-0.0293841	-0.471989	Computed as -level coefficient divided by ECM coefficient.	preferred_maxlag2
credit_business_gdp	-0.347557	-0.471989	Computed as -level coefficient divided by ECM coefficient.	preferred_maxlag2

## Sheet: Cost_Decision
criterion	passed	value	reference
model_with_cost_beats_baseline_bic	TRUE	-3.96083	R1_nominal_spread_eur_12m_credit_business_all_gdp
best_cost_long_run_negative_or_tightening	TRUE	-0.023537	spread_eur_12m
ecm_negative	TRUE	-0.655142	R1_nominal_spread_eur_12m_credit_business_all_gdp
ecm_hac_significant_10pct	TRUE	-4.42582	R1_nominal_spread_eur_12m_credit_business_all_gdp
bounds_like_test_does_not_reject_levels_relation	TRUE	7.68857	R1_nominal_spread_eur_12m_credit_business_all_gdp
survives_at_least_some_robustness	TRUE	42	negative LR in robustness models
not_dependent_on_single_shock_specification	TRUE	1	check no-shock vs shock families

## Sheet: FA_Decision
criterion	passed	value
financial_model_beats_baseline_bic	FALSE	1.52707
financial_ecm_negative	TRUE	-0.590954
financial_ecm_hac_significant_10pct	TRUE	-3.57383
spread_eur_12m_long_run_negative	TRUE	-0.0355698
credit_business_gdp_long_run_recorded	TRUE	-0.2806
best_accelerator_model_beats_financial_bic	FALSE	17.4221
spread_2020_interaction_negative	TRUE	-0.200003
M4_accelerator_spread_interactions_valid_ecm	TRUE	-3.93393
M4_accelerator_credit_interactions_valid_ecm	TRUE	-3.80312
M4_accelerator_full_interactions_valid_ecm	TRUE	-4.04269

## Sheet: Bank_Summary
model_id	family	nobs	aic	bic	adj_r2	ecm_coefficient	ecm_t_hac	bounds_f_stat	bounds_p_approx	xvars	exog	note
M0_no_credit	baseline_no_credit	76	-235.704	-217.058	0.338192	-0.298521	-3.08981	4.06497	0.00516152	LGDP;cpi;spread_eur_12m
M1_credit_business_gdp	credit_ratio	76	-244.922	-221.615	0.426991	-0.590954	-3.57383	5.96689	0.000130162	LGDP;cpi;spread_eur_12m;credit_business_gdp
M2_credit_business_all_gdp	credit_ratio	76	-250.41	-227.103	0.466909	-0.655142	-4.42582	7.68857	9.58566e-06	LGDP;cpi;spread_eur_12m;credit_business_all_gdp
M3_Lcredit_business	credit_log_level	76	-244.893	-221.585	0.42677	-0.587769	-3.7141	6.0532	0.000113746	LGDP;cpi;spread_eur_12m;Lcredit_business
M4_Lcredit_business_all	credit_log_level	76	-254.244	-230.937	0.493136	-0.712968	-5.03197	8.74254	2.10816e-06	LGDP;cpi;spread_eur_12m;Lcredit_business_all
I1_all_gdp_x_2008_09	interaction	76	-245.113	-210.152	0.457823	-0.671495	-4.80107	5.9835	5.79381e-05	LGDP;cpi;spread_eur_12m;credit_business_all_gdp;credit_business_all_gdp_x_2008_09	shock_2008_09;shock_2020;shock_2022	Interaction: credit_business_all_gdp * shock_2008_09.
I2_all_gdp_x_2020	interaction	76	-254.927	-219.966	0.523503	-0.618329	-4.6308	8.24885	1.50085e-06	LGDP;cpi;spread_eur_12m;credit_business_all_gdp;credit_business_all_gdp_x_2020	shock_2008_09;shock_2020;shock_2022	Interaction: credit_business_all_gdp * shock_2020.
I3_all_gdp_x_2022	interaction	76	-241.9	-206.939	0.434413	-0.657648	-4.43039	5.54262	0.000123267	LGDP;cpi;spread_eur_12m;credit_business_all_gdp;credit_business_all_gdp_x_2022	shock_2008_09;shock_2020;shock_2022	Interaction: credit_business_all_gdp * shock_2022.
I4_all_gdp_all_shocks	interaction	76	-250.648	-206.364	0.51443	-0.631257	-4.50341	6.20135	9.53293e-06	LGDP;cpi;spread_eur_12m;credit_business_all_gdp;credit_business_all_gdp_x_2008_09;credit_business_all_gdp_x_2020;credit_business_all_gdp_x_2022	shock_2008_09;shock_2020;shock_2022	All requested interactions together; interpret cautiously in a small sample.

## Sheet: Bank_Long_Run
model_id	variable	long_run_coefficient	ecm_denominator
M0_no_credit	LGDP	0.534067	-0.298521
M0_no_credit	cpi	-0.0108235	-0.298521
M0_no_credit	spread_eur_12m	-0.0287075	-0.298521
M1_credit_business_gdp	LGDP	0.50757	-0.590954
M1_credit_business_gdp	cpi	-0.0145275	-0.590954
M1_credit_business_gdp	spread_eur_12m	-0.0355698	-0.590954
M1_credit_business_gdp	credit_business_gdp	-0.2806	-0.590954
M2_credit_business_all_gdp	LGDP	0.66671	-0.655142
M2_credit_business_all_gdp	cpi	-0.0174636	-0.655142
M2_credit_business_all_gdp	spread_eur_12m	-0.023537	-0.655142
M2_credit_business_all_gdp	credit_business_all_gdp	-0.98828	-0.655142
M3_Lcredit_business	LGDP	0.751962	-0.587769
M3_Lcredit_business	cpi	-0.0148548	-0.587769
M3_Lcredit_business	spread_eur_12m	-0.0371786	-0.587769
M3_Lcredit_business	Lcredit_business	-0.228115	-0.587769
M4_Lcredit_business_all	LGDP	0.908497	-0.712968
M4_Lcredit_business_all	cpi	-0.0169432	-0.712968
M4_Lcredit_business_all	spread_eur_12m	-0.0279372	-0.712968
M4_Lcredit_business_all	Lcredit_business_all	-0.222243	-0.712968
I1_all_gdp_x_2008_09	LGDP	0.671793	-0.671495
I1_all_gdp_x_2008_09	cpi	-0.0153178	-0.671495
I1_all_gdp_x_2008_09	spread_eur_12m	-0.0268538	-0.671495
I1_all_gdp_x_2008_09	credit_business_all_gdp	-0.854365	-0.671495
I1_all_gdp_x_2008_09	credit_business_all_gdp_x_2008_09	-0.556976	-0.671495
I2_all_gdp_x_2020	LGDP	0.667186	-0.618329
I2_all_gdp_x_2020	cpi	-0.0144819	-0.618329
I2_all_gdp_x_2020	spread_eur_12m	-0.0214146	-0.618329
I2_all_gdp_x_2020	credit_business_all_gdp	-0.938672	-0.618329
I2_all_gdp_x_2020	credit_business_all_gdp_x_2020	7.66528	-0.618329
I3_all_gdp_x_2022	LGDP	0.656478	-0.657648
I3_all_gdp_x_2022	cpi	-0.0113497	-0.657648
I3_all_gdp_x_2022	spread_eur_12m	-0.0203244	-0.657648
I3_all_gdp_x_2022	credit_business_all_gdp	-0.869998	-0.657648
I3_all_gdp_x_2022	credit_business_all_gdp_x_2022	0.154366	-0.657648
I4_all_gdp_all_shocks	LGDP	0.682246	-0.631257
I4_all_gdp_all_shocks	cpi	-0.0182739	-0.631257
I4_all_gdp_all_shocks	spread_eur_12m	-0.0281341	-0.631257
I4_all_gdp_all_shocks	credit_business_all_gdp	-0.919449	-0.631257
I4_all_gdp_all_shocks	credit_business_all_gdp_x_2008_09	-0.517889	-0.631257
I4_all_gdp_all_shocks	credit_business_all_gdp_x_2020	7.59577	-0.631257
I4_all_gdp_all_shocks	credit_business_all_gdp_x_2022	-0.0816998	-0.631257

## Sheet: Acronyms
Acronym	Full name	Use
ADF	Augmented Dickey-Fuller	Test për rrënjë njësie.
AIC	Akaike Information Criterion	Kriter informacioni për zgjedhje modeli.
ARDL	Autoregressive Distributed Lag	Model dinamik me vonesa të variablit të varur dhe shpjeguesve.
BIC/SIC	Bayesian/Schwarz Information Criterion	Kriter parsimoni, i dobishëm për mostra të vogla.
BOA/BSH	Bank of Albania / Banka e Shqipërisë	Burim për norma interesi, kredi dhe tituj.
CPI	Consumer Price Index	Tregues i çmimeve të konsumit ose inflacionit.
DPPI	Domestic Producer Price Index	Tregues i kostove/çmimeve prodhuese.
ECM	Error-Correction Mechanism	Koeficient i rikthimit drejt ekuilibrit afatgjatë.
GFCF	Gross Fixed Capital Formation	Formimi Bruto i Kapitalit Fiks; proxy i investimit.
GDP	Gross Domestic Product	Produkti i Brendshëm Bruto.
HAC	Heteroskedasticity and Autocorrelation Consistent	Gabime standarde robuste Newey-West.
I(0)/I(1)	Order of integration	Stacionaritet në nivel ose pas diferencës së parë.
KPSS	Kwiatkowski-Phillips-Schmidt-Shin	Test stacionariteti me hipotezë null stacionaritetin.
LGFCF	Log of GFCF	Logaritmi i investimeve.
LGDP	Log of GDP	Logaritmi i PBB-së.
NPL	Non-performing loans	Kredi me probleme.
PP	Phillips-Perron	Test rrënjë njësie robust ndaj strukturave të caktuara të gabimit.
PSS	Pesaran-Shin-Smith	Korniza e bounds testing për ARDL.
UECM	Unrestricted Error-Correction Model	Forma e pakufizuar e korrigjimit të gabimit.

[truncated: 3 more sheets: Core_Data_SpreadConsistent, ECB_EURIBOR_12M_Q, Spread_Tests]
