# Supplementary material
Source: Research Square preprint supplement (doi:10.21203/rs.3.rs-10296059/v1)
Supplement: Supplementary file 6 [file dfd7271992357be85b50f2ac.docx]

**Annex C. Financial Accelerator**

**The purpose of the annex**

Annex C documents the evidence on the financial accelerator. The goal is not to claim complete structural identification, but to assess whether the data support a financial channel that can amplify the investment cycle.

**Theoretical framework**

Bernanke and Gertler (1989), Bernanke, Gertler and Gilchrist (1999) and Kiyotaki and Moore (1997) relate investment to balance sheets, collateral, net worth and the external funding premium. When balance sheets weaken, the external financing cost rises and investment may fall more than the initial shock alone would suggest.

**Empirical specification**

Due to the lack of micro data on net worth, collateral and bank capital, the annex uses macro-financial proxies: spreads, credit-to-GDP ratios and shock dummies 2008-09, 2020 and 2022. These do not fully identify the mechanism, but test its macroeconomic coherence.

**Interpretation of results**

*Table `FA_Decision` presents the decision criteria for the financial accelerator. The evidence supports the existence of a financial channel, but not the strong claim that the financial accelerator has been fully proven. This limitation is part of the scientific result, not a hidden weakness of the model.*

**Limitations and resources**

*Source: author's calculations on a harmonized empirical basis. A more robust assessment requires data on firms' balance sheets, collateral, asset prices, bank capital and non-performing loans.*

**Raw data and supporting tables**

The complete table for this annex is stored in the supplementary material `Annex_C_raw_financial_accelerator.csv`. For readability reasons, DOCX presents a limited view of rows and columns; CSV stores the entire numeric base for verification.

*Table. Summary view of the gross data of the annex.*

| **dated** | **LGFCF** | **LGDP** | **spread_all_12m** | **spread_eur_euribor_12m** | **credit_business_gdp** | **credit_business_all_gdp** | **shock_2008_09** |
| --- | --- | --- | --- | --- | --- | --- | --- |
| 2006Q4 | 11.5099 | 12.3601 | 6.3600 | 4.0021 | 0.5447 | 0.1127 | 0 |
| 2007Q1 | 11.5184 | 12.3895 | 6.5267 | 4.1822 | 0.5887 | 0.1154 | 0 |
| 2007Q2 | 11.5255 | 12.4127 | 5.0900 | 3.9762 | 0.6139 | 0.1269 | 0 |
| 2007Q3 | 11.5327 | 12.4519 | 5.1367 | 3.7918 | 0.6327 | 0.1307 | 0 |
| 2007Q4 | 11.5430 | 12.5007 | 5.9233 | 3.9777 | 0.6779 | 0.1330 | 0 |
| 2008Q1 | 11.5539 | 12.5173 | 4.9500 | 3.3477 | 0.7157 | 0.1381 | 1 |
| 2008Q2 | 11.5722 | 12.5270 | 4.8167 | 3.4352 | 0.7850 | 0.1557 | 1 |
| 2008Q3 | 11.5848 | 12.5594 | 4.5833 | 3.0366 | 0.8235 | 0.1582 | 1 |
| 2008Q4 | 11.5946 | 12.5683 | 4.4900 | 3.6999 | 0.8425 | 0.1709 | 1 |
| 2009Q1 | 11.5884 | 12.5959 | 4.8167 | 5.4414 | 0.8678 | 0.1855 | 1 |
| 2009Q2 | 11.6383 | 12.6070 | 4.3867 | 6.0047 | 0.8678 | 0.2006 | 1 |
| 2009Q3 | 11.5776 | 12.5934 | 4.0600 | 6.5909 | 0.9118 | 0.2318 | 1 |
| 2009Q4 | 11.4966 | 12.5868 | 4.4267 | 7.0481 | 0.9412 | 0.2404 | 1 |
| 2010Q1 | 11.4937 | 12.6330 | 4.6467 | 6.2892 | 0.9252 | 0.2363 | 0 |

*Note: the complete table is stored in the supplementary material `Annex_C_raw_financial_accelerator.csv`.*
